# Supplementary material for: Zn(ii) and Cu(ii) formamidine complexes: structural, kinetics and polymer tacticity studies in the ring-opening polymerization of ε-caprolactone and lactides
Source: Royal Society of Chemistry journal article supplement (doi:10.1039/c5nj03159a), 2016-01-01
Supplement: c5nj03159a1.pdf [file c5nj03159a1.pdf]

## Zn(II) and Cu(II) formamidine complexes: Structural, kinetics and polymer tacticity studies in ring-opening polymerization of $\epsilon$ -caprolactone and lactides

Ekemini D. Akpan,<sup>†</sup> Stephen O. Ojwach,<sup>\*‡</sup> Bernard Omondi,<sup>\*†</sup> and Vincent O. Nyamori,<sup>†</sup>

<sup>†</sup>School of Chemistry and Physics, Westville Campus, University of KwaZulu-Natal, Private Bag X54001, Durban, 4000, South Africa.

<sup>‡</sup>School of Chemistry and Physics, Pietermaritzburg Campus, University of KwaZulu-Natal, Private Bag X01, Scottsville, 3209, South Africa.

Journal in which to be published: New Journal of Chemistry.

### Supplementary Information

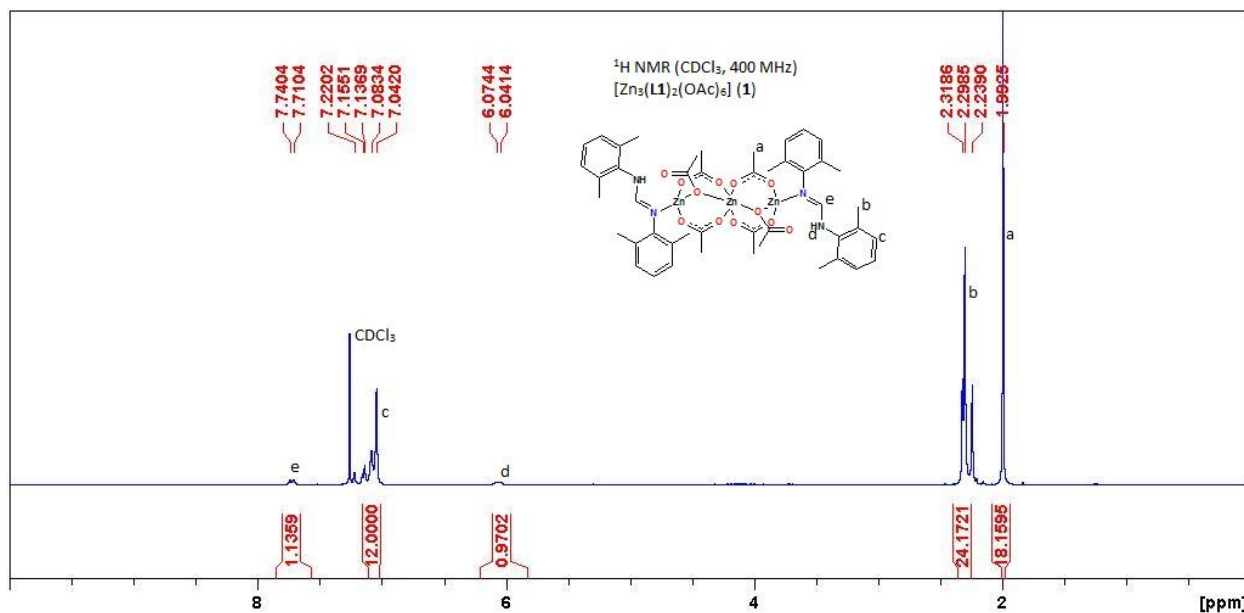

Figure S1. <sup>1</sup>H NMR spectrum of complex **1** in CDCl<sub>3</sub> at room temperature.

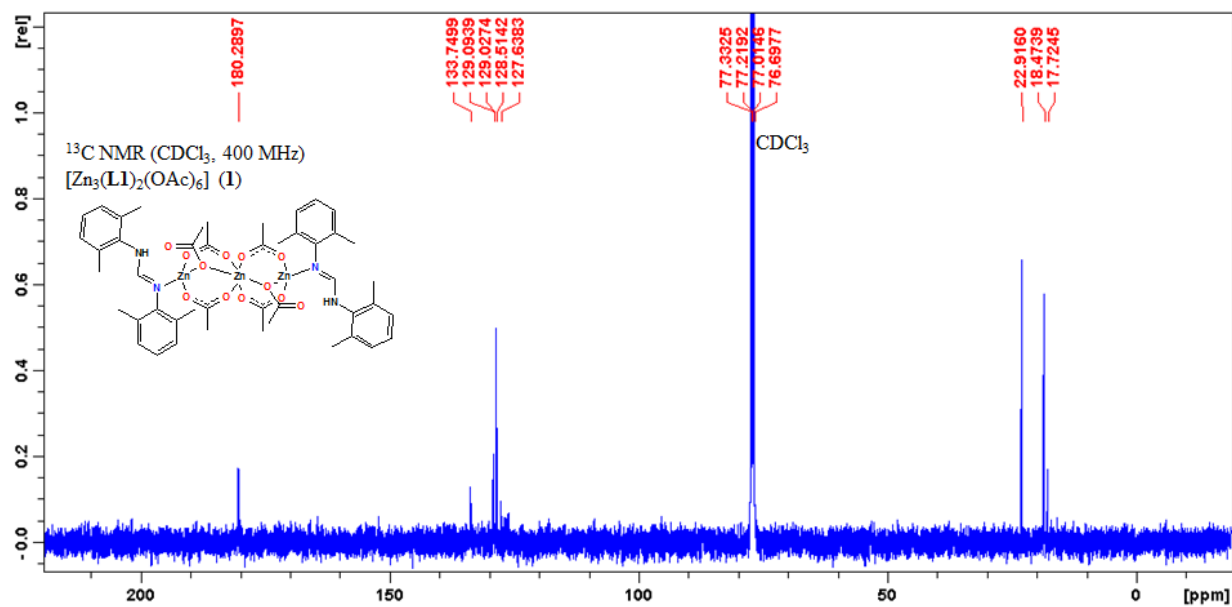

**Figure S2.** <sup>13</sup>C NMR spectrum of complex **1** in CDCl<sub>3</sub> at room temperature.

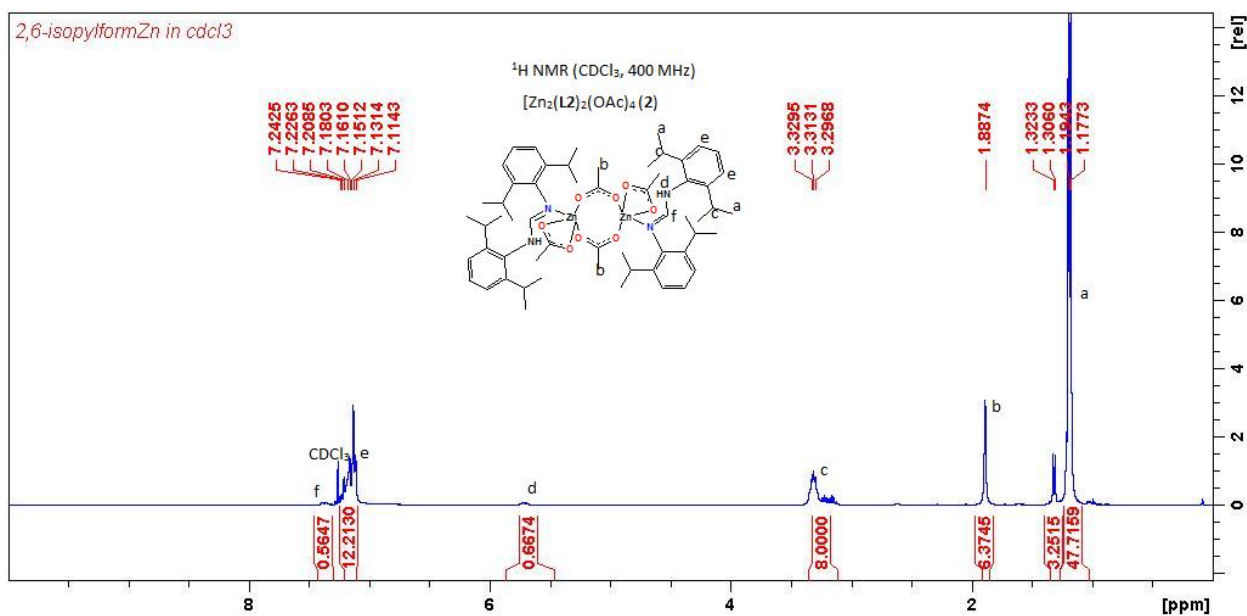

**Figure S3.** <sup>1</sup>H NMR spectrum of complex **2** in CDCl<sub>3</sub> at room temperature.

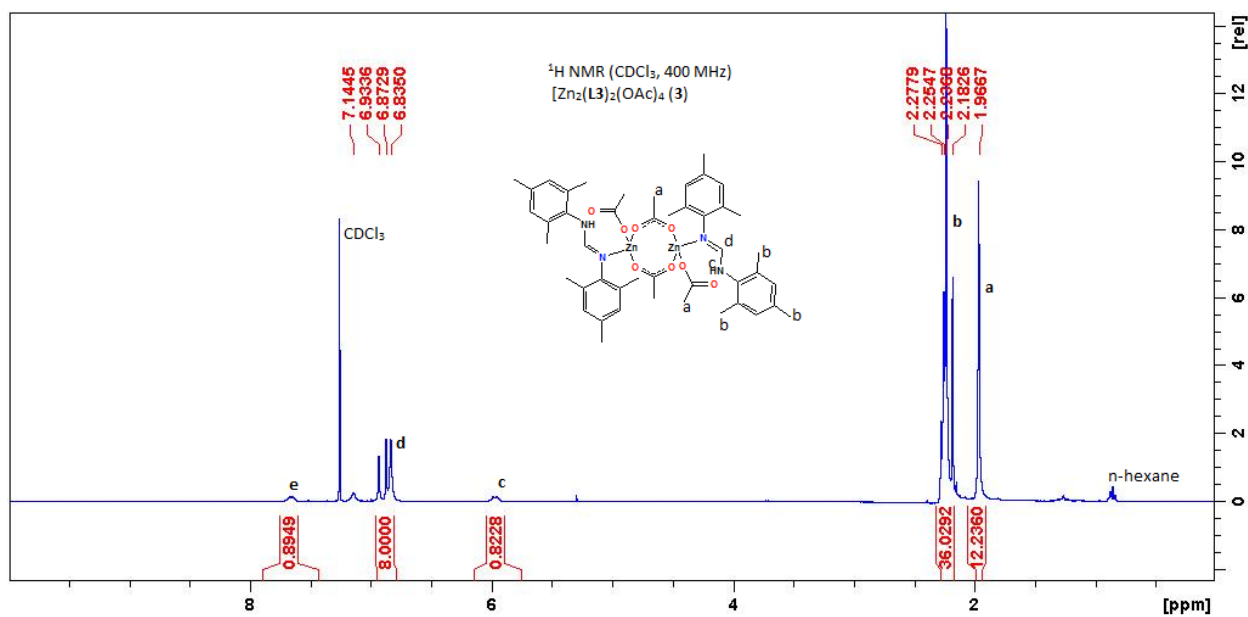

**Figure S4.** <sup>1</sup>H NMR spectrum of complex **3** in CDCl<sub>3</sub> at room temperature.

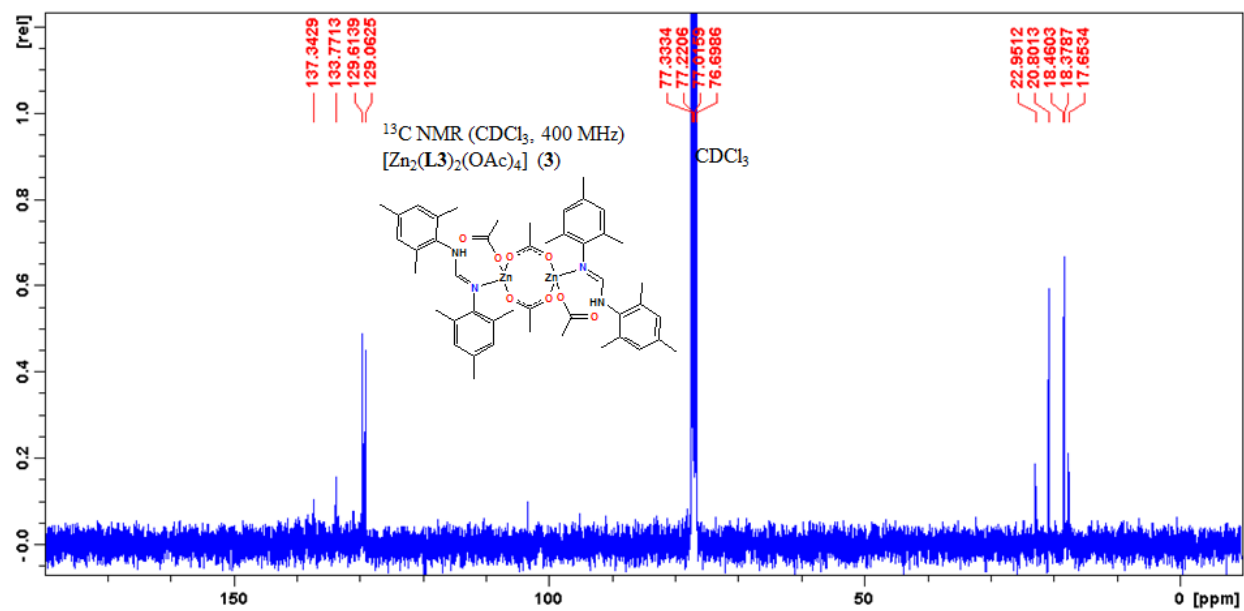

**Figure S5.** <sup>13</sup>C NMR spectrum of complex **3** in CDCl<sub>3</sub> at room temperature.

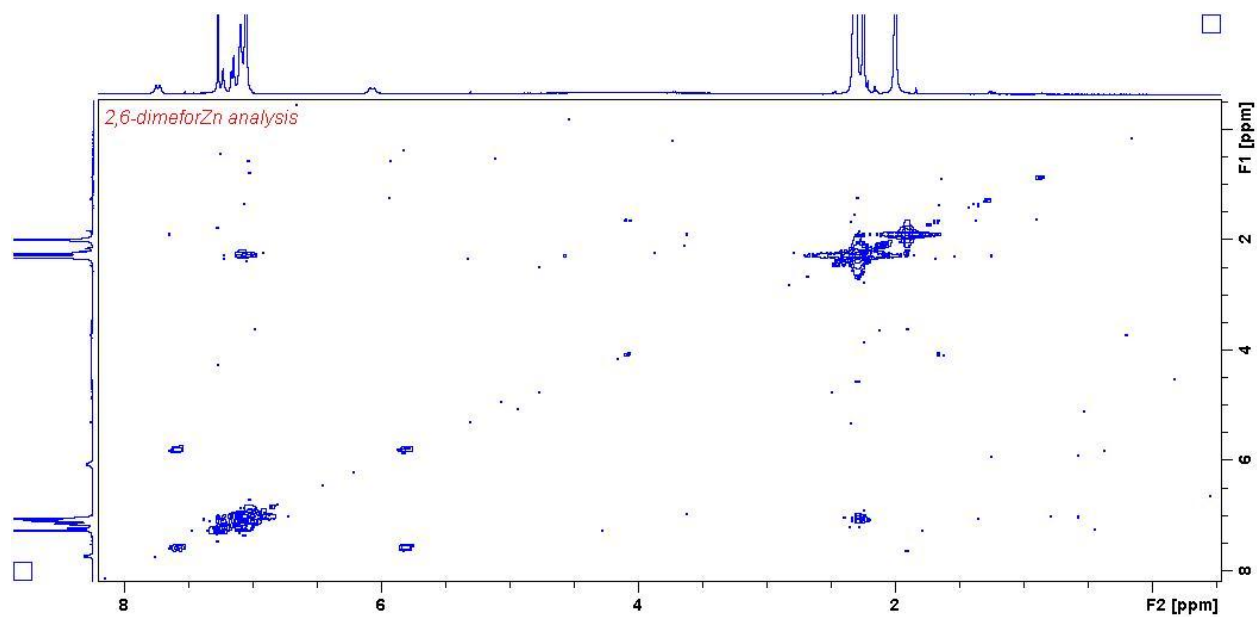

**Figure S6.** COSY NMR spectrum of complex **1** in  $\text{CDCl}_3$  at room temperature.

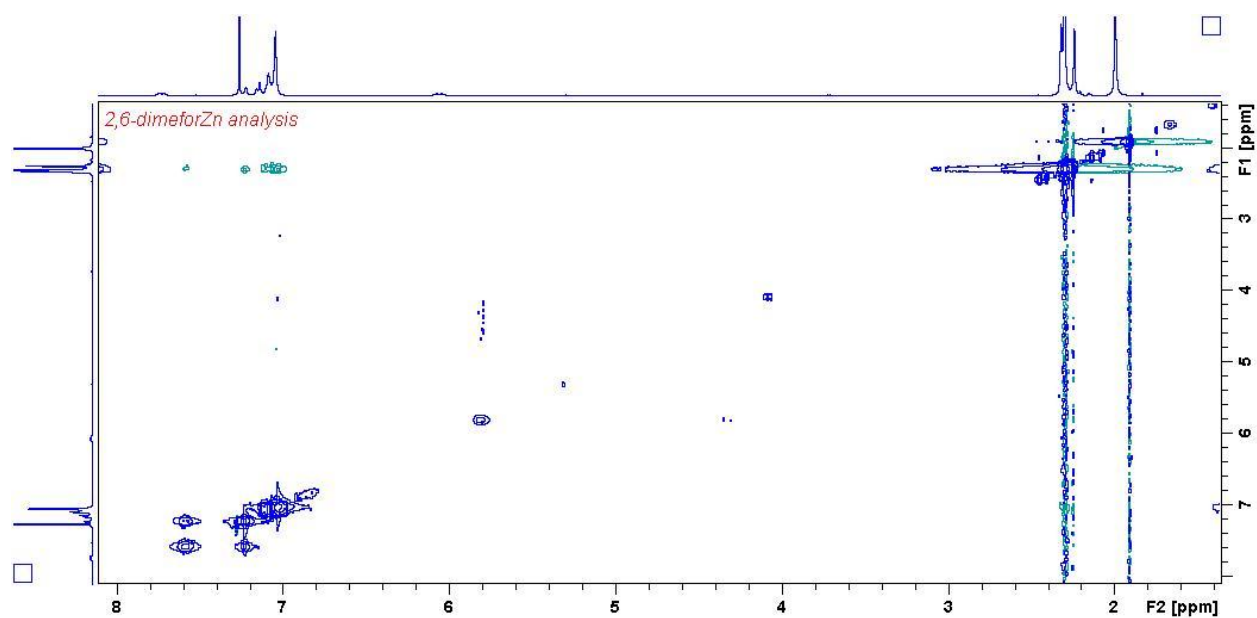

**Figure S7.** Two dimensional (2D)  $^1\text{H}$ - $^1\text{H}$  nuclear overhauser effect spectroscopy (NOESY) NMR of complex **1** in  $\text{CDCl}_3$  at room temperature.

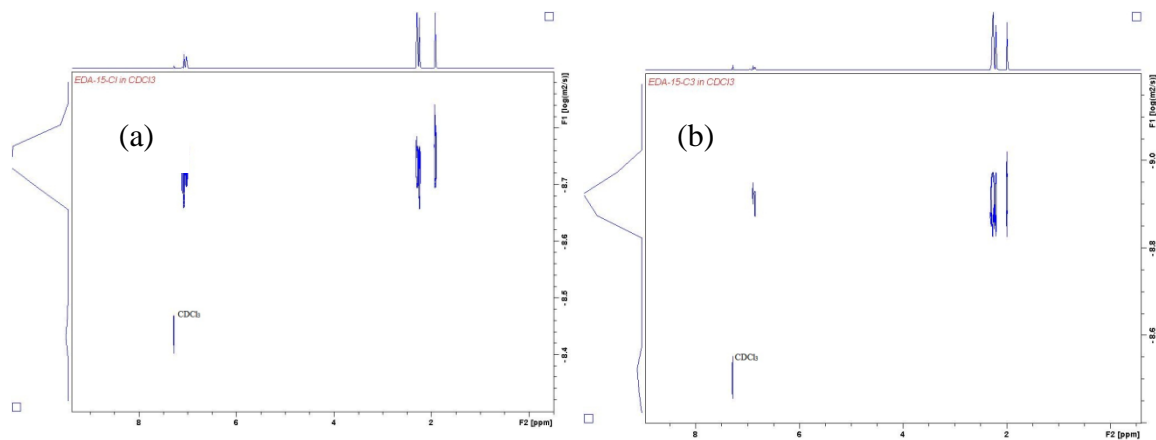

**Figure S8.** DOSY NMR spectra of complexes (a) **1** and (b) **3**

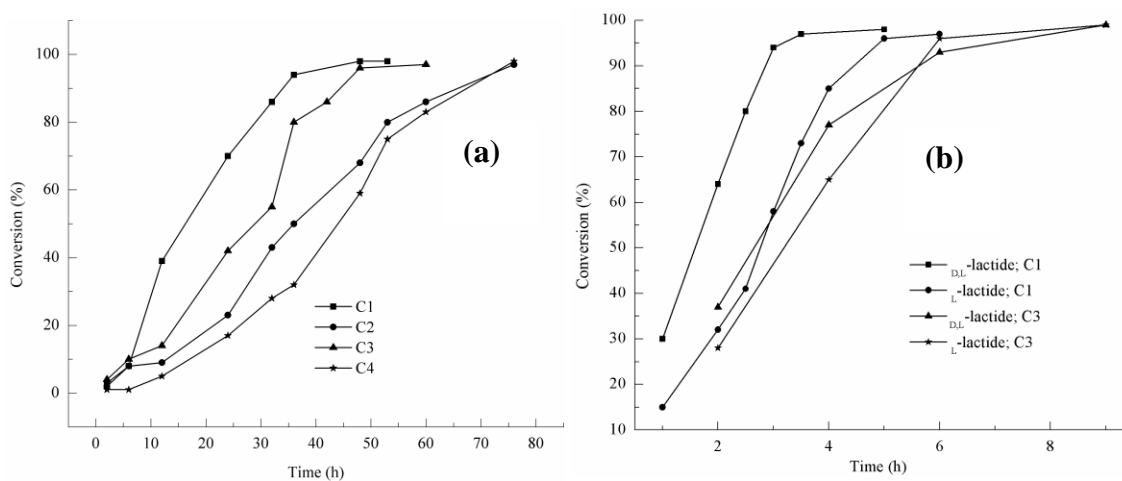

**Figure S9.** (a) Bulk polymerization of  $\epsilon$ -CL to PCL with time for complexes **1–4** at 110 °C,  $M/I = 200$ ,  $[CL]_0 = 0.01$  mol and  $[I] = 0.00005$  mol and (b) Polymerization of D,L-lactide and L-lactide to polylactides using complexes **1** and **3** in toluene at 110 °C,  $[CL]_0/[I] = 200$ .

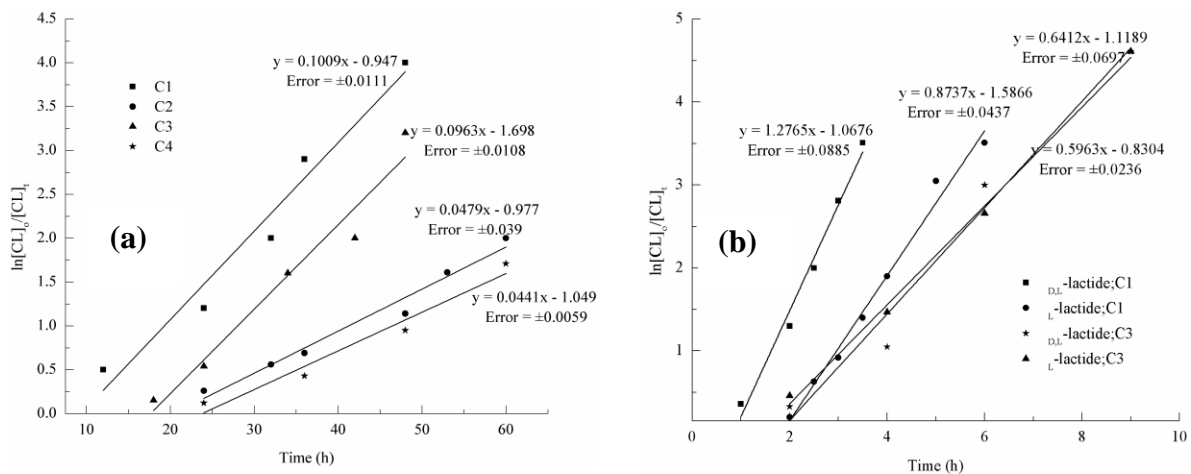

**Figure S10.** (a) First order kinetic plots of  $\ln[CL]_0/[CL]_t$  vs. time for complexes 1–4 in the bulk polymerization of  $\epsilon$ -CL at 110 °C,  $[CL]_0/[I] = 200$ . (b) First order kinetic plots of  $\ln[CL]_0/[CL]_t$  vs. time for complexes 1 and 3 in the polymerization of D,L-lactide and L-lactide to poly lactides in toluene at 110 °C,  $[CL]_0/[I] = 200$ .

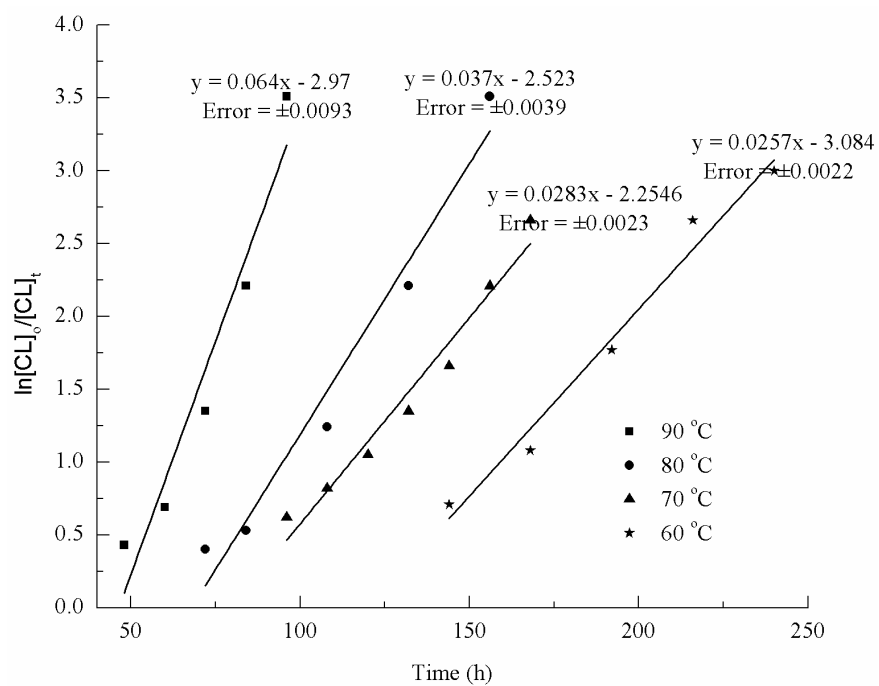

**Figure S11.** Semi-logarithmic kinetic plots for  $\epsilon$ -CL polymerization catalyzed by complex **3** at various temperatures

| SAMPLE INFORMATION |               |                 |                        |
|--------------------|---------------|-----------------|------------------------|
| Sample Name:       | ED003         | Acquired By:    | System                 |
| Sample Type:       | Broad Unknown | Date Acquired:  | 2014/12/03 07:25:32 PM |
| Vial:              | 3             | Acq. Method:    | GPC_im_UV254_320       |
| Injection #:       | 1             | Date Processed: | 2014/12/04 08:23:02 AM |
| Injection Volume:  | 100.00 ul     | Channel Name:   | 410                    |
| Run Time:          | 30.00 Minutes | Channel Desc.:  | RI Detector            |
| Column Type:       |               | Sample Set Name | 20141203pm             |

Broad Unknown Relative Chromatogram

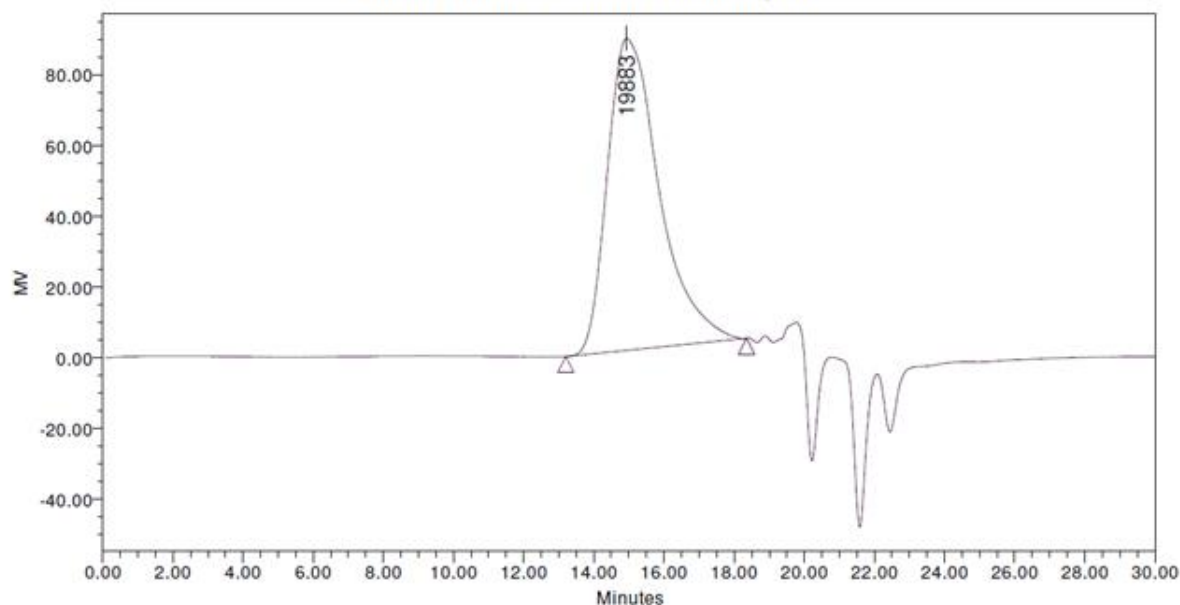

Broad Unknown Relative Peak Table

| Distribution Name | Mn (Daltons) | Mw (Daltons) | MP (Daltons) | Mz (Daltons) | Mz+1 (Daltons) | Polydispersity | Mz/Mw    | Mz+1/Mw  |
|-------------------|--------------|--------------|--------------|--------------|----------------|----------------|----------|----------|
| 1                 | 8631         | 18468        | 19883        | 28657        | 38314          | 2.139812       | 1.551756 | 2.074657 |

Figure S12. GPC traces of PCL obtained from catalyst **3**, M/I = 200, time 53 h, 110 °C.



| SAMPLE INFORMATION |               |                 |                        |
|--------------------|---------------|-----------------|------------------------|
| Sample Name:       | ED013         | Acquired By:    | System                 |
| Sample Type:       | Broad Unknown | Date Acquired:  | 2014/12/04 12:45:57 AM |
| Vial:              | 13            | Acq. Method:    | GPC_im_UV254_320       |
| Injection #:       | 1             | Date Processed: | 2014/12/04 08:23:02 AM |
| Injection Volume:  | 100.00 ul     | Channel Name:   | 410                    |
| Run Time:          | 30.00 Minutes | Channel Desc.:  | RI Detector            |
| Column Type:       |               | Sample Set Name | 20141203pm             |

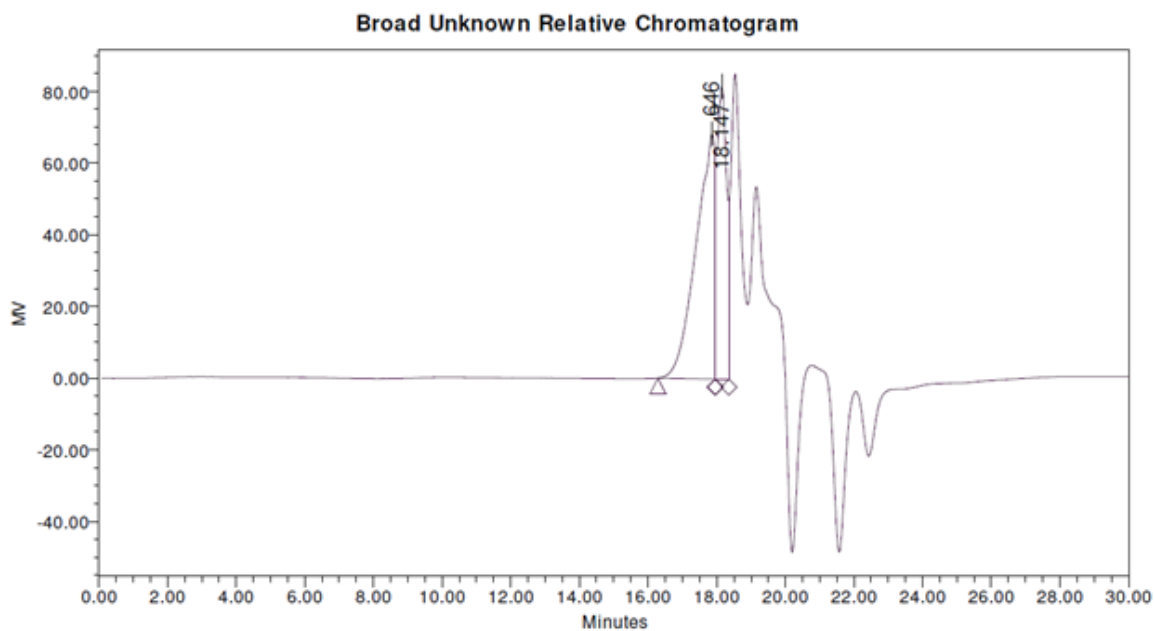

**Broad Unknown Relative Peak Table**

| Distribution Name | Mn (Daltons) | Mw (Daltons) | MP (Daltons) | Mz (Daltons) | Mz+1 (Daltons) | Polydispersity | Mz/Mw    | Mz+1/Mw  |
|-------------------|--------------|--------------|--------------|--------------|----------------|----------------|----------|----------|
| 1                 | 898          | 1006         | 646          | 1164         | 1381           | 1.120301       | 1.157019 | 1.372802 |

**Figure S13.** GPC traces of PCL obtained from catalyst **3**, M/I = 200, in methanol, time 180 mins, 110 °C.

| SAMPLE INFORMATION |               |                 |                        |
|--------------------|---------------|-----------------|------------------------|
| Sample Name:       | ED016         | Acquired By:    | System                 |
| Sample Type:       | Broad Unknown | Date Acquired:  | 2014/12/04 02:22:02 AM |
| Vial:              | 16            | Acq. Method:    | GPC_im_UV254_320       |
| Injection #:       | 1             | Date Processed: | 2014/12/04 08:23:02 AM |
| Injection Volume:  | 100.00 ul     | Channel Name:   | 410                    |
| Run Time:          | 30.00 Minutes | Channel Desc.:  | RI Detector            |
| Column Type:       |               | Sample Set Name | 20141203pm             |

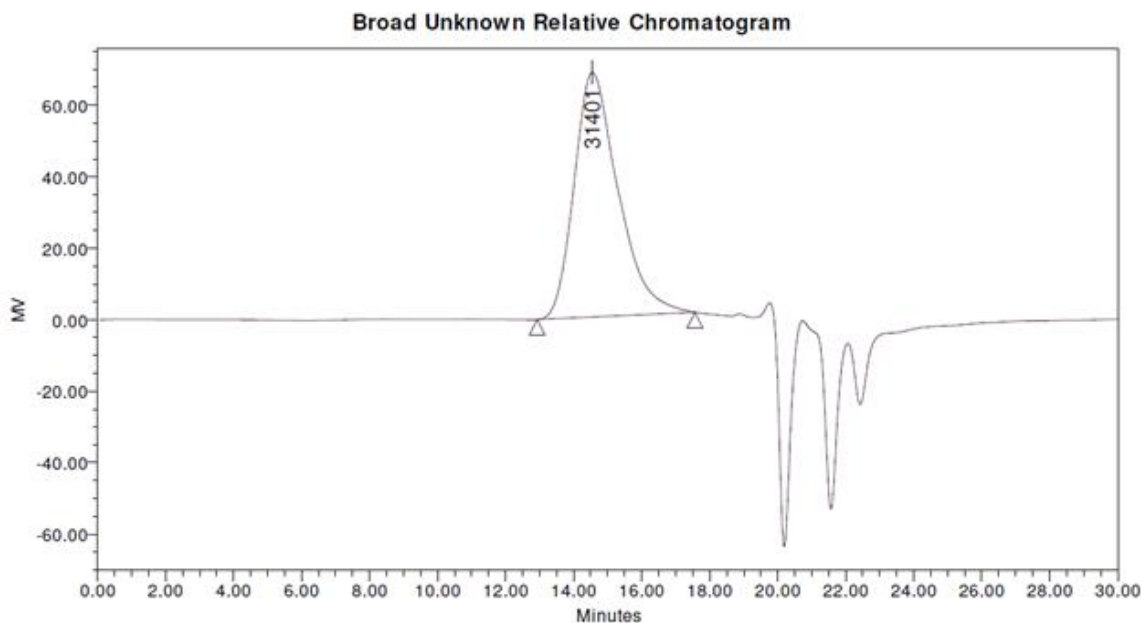

**Broad Unknown Relative Peak Table**

| Distribution Name | Mn (Daltons) | Mw (Daltons) | MP (Daltons) | Mz (Daltons) | Mz+1 (Daltons) | Polydispersity | Mz/Mw    | Mz+1/Mw  |
|-------------------|--------------|--------------|--------------|--------------|----------------|----------------|----------|----------|
| 1                 | 16866        | 31127        | 31401        | 45986        | 61134          | 1.845614       | 1.477348 | 1.963994 |

**Figure S14.** GPC traces of PLA obtained from catalyst **3**, M/I = 200, in toluene, time 9 h, 110 °C.

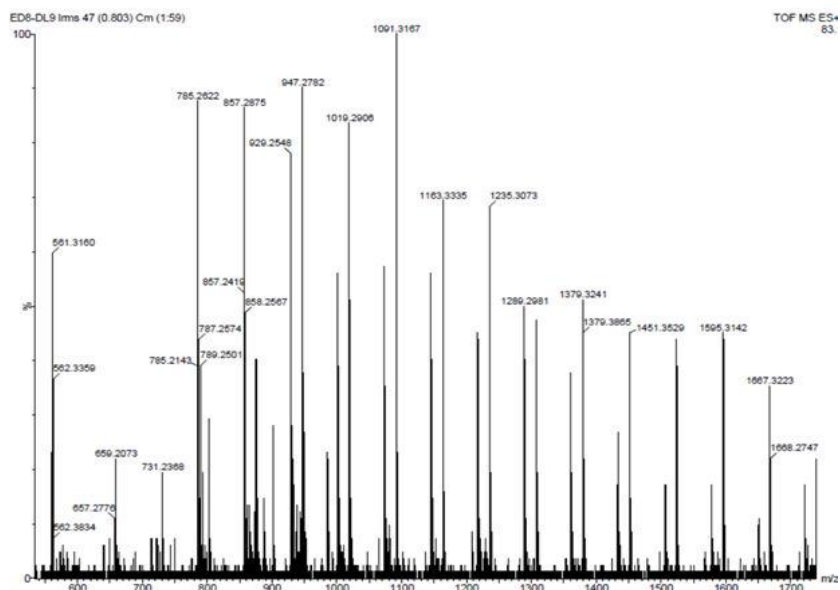

**Figure S15.** ES-MS of the crude PLA (from  $D,L$ -lactide) from catalyst **3**,  $[CL]_0/[3] = 200$ , 9 h, showing distribution of two structural components.

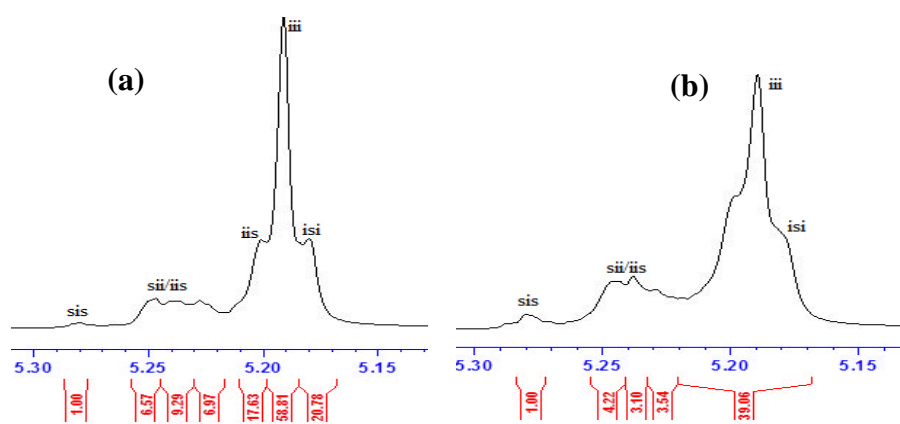

**Figure S16.**  $^1H$  homonuclear decoupled NMR of the methine region of poly( $L$ -LA) formed with (a) complex **1** and (b) complex **3**, respectively.

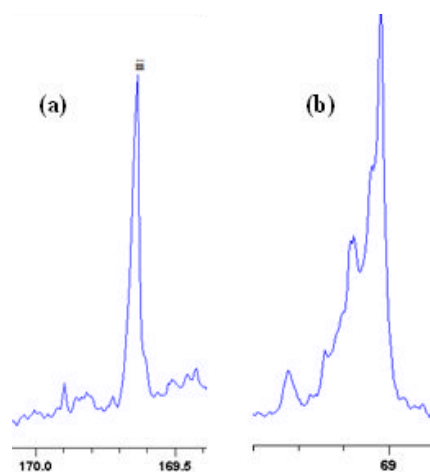

**Figure S17.** (a)  $^{13}\text{C}$  NMR spectra carbonyl region and (b)  $^{13}\text{C}$  NMR methine region of poly(L-LA).

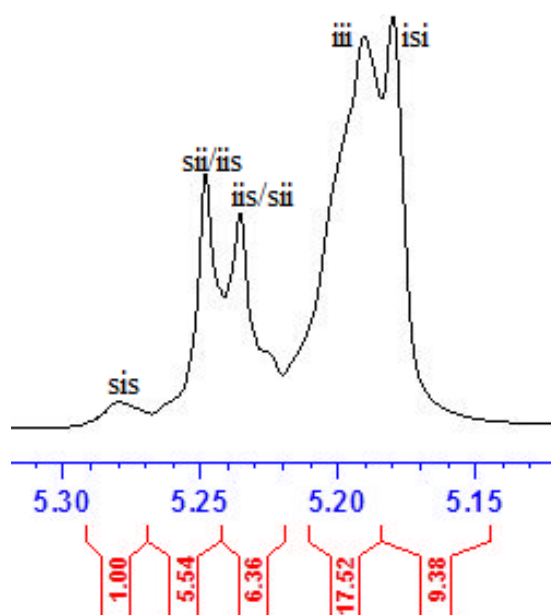

**Figure S18.**  $^1\text{H}$  homonuclear decoupled NMR of the methine region of poly(D,L-LA).

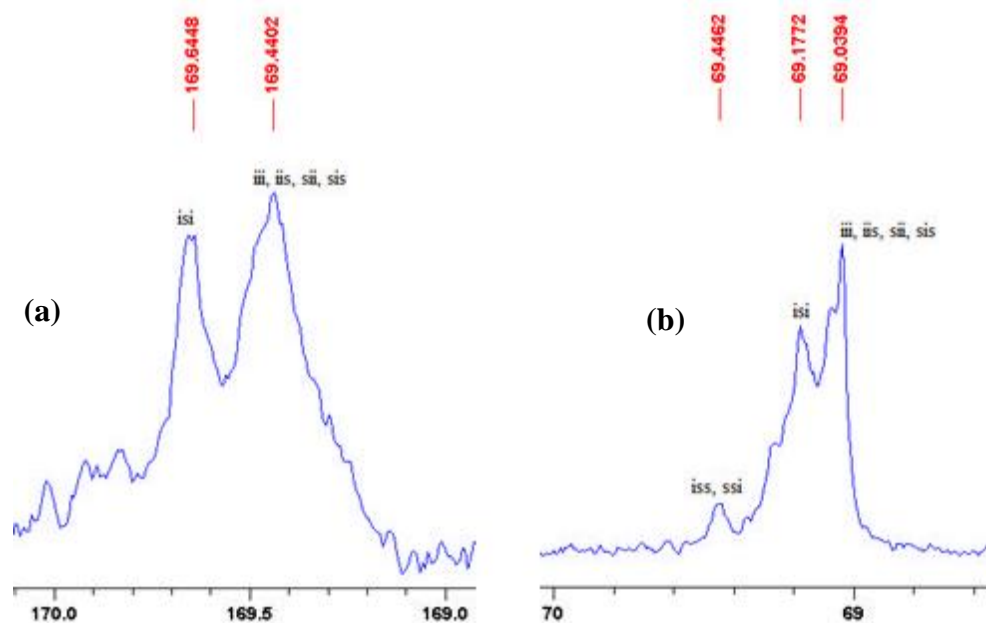

**Figure S19.** (a)  $^{13}\text{C}$  NMR spectra carbonyl region and (b)  $^{13}\text{C}$  NMR methine region of poly(D,L-LA)

**Table S1.** Crystal data collection and structural refinement parameters for complexes 1–4

|                                         | 1                                                                              | 2                                                                             | 3                                                                             | 4                                                                             |
|-----------------------------------------|--------------------------------------------------------------------------------|-------------------------------------------------------------------------------|-------------------------------------------------------------------------------|-------------------------------------------------------------------------------|
| <b>Empirical formula</b>                | C <sub>46</sub> H <sub>58</sub> N <sub>4</sub> O <sub>12</sub> Zn <sub>3</sub> | C <sub>58</sub> H <sub>84</sub> N <sub>4</sub> O <sub>8</sub> Zn <sub>2</sub> | C <sub>46</sub> H <sub>60</sub> N <sub>4</sub> O <sub>8</sub> Zn <sub>2</sub> | C <sub>58</sub> H <sub>84</sub> Cu <sub>2</sub> N <sub>4</sub> O <sub>8</sub> |
| <b>Formula weight</b>                   | 1055.07                                                                        | 1096.03                                                                       | 927.72                                                                        | 1092.37                                                                       |
| <b>Temperature (K)</b>                  | 173(2)                                                                         | 173(2)                                                                        | 293(2)                                                                        | 173(2)                                                                        |
| <b>Wavelength (Å)</b>                   | 0.71073                                                                        | 0.71073                                                                       | 0.71073                                                                       | 0.71073                                                                       |
| <b>Crystal system</b>                   | Monoclinic                                                                     | Triclinic                                                                     | Triclinic                                                                     | Monoclinic                                                                    |
| <b>Space group</b>                      | <i>P</i> 2 <sub>1</sub> / <i>c</i>                                             | <i>P</i> -1                                                                   | <i>P</i> -1                                                                   | <i>P</i> 2 <sub>1</sub> / <i>c</i>                                            |
| <b>a/Å</b>                              | 9.5958(6)                                                                      | 13.9570(3)                                                                    | 9.4219(7)                                                                     | 15.4331(10)                                                                   |
| <b>b/Å</b>                              | 15.6026(9)                                                                     | 21.3908(4)                                                                    | 12.1061(9)                                                                    | 12.4453(9)                                                                    |
| <b>c/Å</b>                              | 16.4916(10)                                                                    | 21.4967(5)                                                                    | 20.8673(18)                                                                   | 16.2537(11)                                                                   |
| <b>α</b>                                | 90°                                                                            | 94.542(10)°                                                                   | 85.831(5)°                                                                    | 90°                                                                           |
| <b>β</b>                                | 103.752(2)°                                                                    | 108.766(10)°                                                                  | 85.579(5)°                                                                    | 104.965(3)°                                                                   |
| <b>γ</b>                                | 90°                                                                            | 100.316(10)°                                                                  | 77.657(4)°                                                                    | 90°                                                                           |
| <b>Volume (Å<sup>3</sup>)</b>           | 2398.3(3)                                                                      | 5913.6(2)                                                                     | 2314.4(3)                                                                     | 3016.0(4)                                                                     |
| <b>Z</b>                                | 2                                                                              | 4                                                                             | 2                                                                             | 2                                                                             |
| <b>Density (calculated)</b>             | 1.461 Mg/m <sup>3</sup>                                                        | 1.231 Mg/m <sup>3</sup>                                                       | 1.331 Mg/m <sup>3</sup>                                                       | 1.203 Mg/m <sup>3</sup>                                                       |
| <b>Absorption coefficient</b>           | 1.552 mm <sup>-1</sup>                                                         | 0.864 mm <sup>-1</sup>                                                        | 1.091 mm <sup>-1</sup>                                                        | 0.757 mm <sup>-1</sup>                                                        |
| <b>F(000)</b>                           | 1096                                                                           | 2336                                                                          | 976                                                                           | 1164                                                                          |
| <b>Crystal size</b>                     | 0.41 x 0.36 x 0.32 mm <sup>3</sup>                                             | 0.36 x 0.33 x 0.29 mm <sup>3</sup>                                            | 0.18 x 0.15 x 0.12 mm <sup>3</sup>                                            | 0.36 x 0.34 x 0.34 mm <sup>3</sup>                                            |
| <b>Theta range for data collection</b>  | 1.82 to 28.59°                                                                 | 0.978 to 28.433°                                                              | 0.980 to 27.917°                                                              | 1.366 to 25.493°                                                              |
| <b>Index ranges</b>                     | -12 ≤ h ≤ 12, -20 ≤ k ≤ 20, -21 ≤ l ≤ 22                                       | -17 ≤ h ≤ 18, -27 ≤ k ≤ 28, -27 ≤ l ≤ 28                                      | -12 ≤ h ≤ 12, -15 ≤ k ≤ 14, -26 ≤ l ≤ 26                                      | -18 ≤ h ≤ 18, -15 ≤ k ≤ 15, -19 ≤ l ≤ 19                                      |
| <b>Reflections collected</b>            | 53536                                                                          | 133169                                                                        | 36720                                                                         | 57141                                                                         |
| <b>Independent reflections</b>          | 6033 [R(int) = 0.0176]                                                         | 28279 [R(int) = 0.0230]                                                       | 10307 [R(int) = 0.0342]                                                       | 5593 [R(int) = 0.0338]                                                        |
| <b>Completeness to theta = 28.59°</b>   | 100%                                                                           | 100.0%                                                                        | 98.10%                                                                        | 100.0%                                                                        |
| <b>Absorption correction</b>            | Semi-empirical from equivalents                                                | Semi-empirical from equivalents                                               | Semi-empirical from equivalents                                               | Semi-empirical from equivalents                                               |
| <b>Max. and min. transmission</b>       | 0.609 and 0.524                                                                | 0.791 and 0.683                                                               | 0.877 and 0.822                                                               | 0.773 and 0.769                                                               |
| <b>Refinement method</b>                | Full-matrix least-squares on F <sup>2</sup>                                    | Full-matrix least-squares on F <sup>2</sup>                                   | Full-matrix least-squares on F <sup>2</sup>                                   | Full-matrix least-squares on F <sup>2</sup>                                   |
| <b>Data / restraints / parameters</b>   | 6032 / 0 / 302                                                                 | 28279 / 2 / 1348                                                              | 10307 / 5 / 567                                                               | 5593 / 0 / 325                                                                |
| <b>Goodness-of-fit on F<sup>2</sup></b> | 1.059                                                                          | 1.041                                                                         | 1.135                                                                         | 1.095                                                                         |
| <b>Final R indices [I&gt;2σ(I)]</b>     | R1 = 0.0273, wR <sub>2</sub> = 0.0715                                          | R1 = 0.0338, wR <sub>2</sub> = 0.0815                                         | R1 = 0.0510, wR <sub>2</sub> = 0.1165                                         | R1 = 0.0312, wR <sub>2</sub> = 0.0841                                         |
| <b>R indices (all data)</b>             | R1 = 0.0287, wR <sub>2</sub> = 0.0725                                          | R1 = 0.0475, wR <sub>2</sub> = 0.0910                                         | R1 = 0.0633, wR <sub>2</sub> = 0.1237                                         | R1 = 0.0361, wR <sub>2</sub> = 0.0875                                         |
| <b>Largest diff. peak and hole</b>      | 0.949 and -0.742 e.Å <sup>-3</sup>                                             | 0.745 and -0.480 e.Å <sup>-3</sup>                                            | 0.740 and -0.555 e.Å <sup>-3</sup>                                            | 0.351 and -0.361 e.Å <sup>-3</sup>                                            |
